# Supplementary material for: Evidence used in model-based economic evaluations for evaluating pharmacogenetic and pharmacogenomic tests: a systematic review protocol
Source: HighWire-hosted journal article supplement (doi:10.1136/bmjopen-2015-008465), 2015-11-01
Supplement: bmjopen-2015-008465supp_table.pdf [file bmjopen-2015-008465supp_table.pdf]

## Online Supplementary Material

**Title: Evidence used in model based economic evaluations for evaluating pharmacogenetic and pharmacogenomic tests: a systematic review protocol**

Jaime L Peters<sup>1</sup>, Chris Cooper<sup>1</sup>, James Buchanan<sup>2</sup>

<sup>1</sup> Evidence Synthesis & Modelling for Health Improvement (ESMI), University of Exeter Medical School, Exeter, United Kingdom.

<sup>2</sup> Health Economics Research Centre, Nuffield Department of Population Health, University of Oxford, Oxford, United Kingdom

Modified Phillips checklist for the quality of decision models in health technology assessment

|                                                                                                                                                                                            | Comments |
|--------------------------------------------------------------------------------------------------------------------------------------------------------------------------------------------|----------|
| Is there a clear statement of the decision problem?                                                                                                                                        |          |
| Is the primary decision-maker specified?                                                                                                                                                   |          |
| Are the model inputs consistent with the stated perspective?                                                                                                                               |          |
| Has the scope of the model been stated and justified?                                                                                                                                      |          |
| Is the structure of the model consistent with a coherent theory of the health condition under evaluation?                                                                                  |          |
| Are the sources of the data used to develop the structure of the model specified?                                                                                                          |          |
| Are the structural assumptions transparent and justified?                                                                                                                                  |          |
| Is there a clear definition of the options under evaluation?                                                                                                                               |          |
| Have all feasible and practical options been evaluated?                                                                                                                                    |          |
| Is there justification for the exclusion of feasible options?                                                                                                                              |          |
| Is the time horizon of the model sufficient to reflect all important differences between the options?                                                                                      |          |
| Do the disease states (state transition model) or the pathways (decision tree model) reflect the underlying biological process of the disease in question and the impact of interventions? |          |
| Is the cycle length defined and justified in terms of the natural history of disease?                                                                                                      |          |
| Are the data identification methods transparent and appropriate given the objectives of the model?                                                                                         |          |
| Where choices have been made between data sources, are these justified appropriately?                                                                                                      |          |
| Has the quality of the data been assessed appropriately?                                                                                                                                   |          |
| Where expert opinion has been used are the methods described and justified?                                                                                                                |          |
| Is the choice of baseline data described and justified?                                                                                                                                    |          |
| Are transition probabilities calculated appropriately?                                                                                                                                     |          |
| Has a half-cycle correction been applied to both costs and outcomes?                                                                                                                       |          |
| If not, has the omission been justified?                                                                                                                                                   |          |
| Have the methods and assumptions used to extrapolate short-term results to final outcomes been documented and justified?                                                                   |          |
| Are the costs incorporated into the model justified?                                                                                                                                       |          |
| Has the source for all costs been described?                                                                                                                                               |          |
| Have discount rates been described and justified given the target decision-maker?                                                                                                          |          |
| Are the utilities incorporated into the model appropriate?                                                                                                                                 |          |
| Is the source of utility weights referenced?                                                                                                                                               |          |
| Have all data incorporated into the model been described and referenced in sufficient detail?                                                                                              |          |
| Have methodological uncertainties been addressed by running alternative versions of the model with different methodological assumptions?                                                   |          |
| Is there evidence that structural uncertainties have been addressed via sensitivity analysis?                                                                                              |          |
| Has heterogeneity been dealt with by running the model separately for different subgroups?                                                                                                 |          |
| Are the methods of assessment of parameter uncertainty appropriate?                                                                                                                        |          |
| Have the results been compared with those of previous models and any differences in results explained?                                                                                     |          |
